# Supplementary material for: Structure and functional analysis of the Legionella pneumophila chitinase ChiA reveals a novel mechanism of metal-dependent mucin degradation
Source: PubMed Central journal article supplement (PMC7224574; doi:10.1371/journal.ppat.1008342), 2020-05-04
Supplement: ppat.1008342.s013.pdf [file ppat.1008342.s013.pdf]

**S1 Table. Tertiary structure predictions of ChiA N-terminal subdomains.**

| ChiA domain | Protein Name     | Organism                                                 | Function                                                            | Sequence identity | PDB code  | Ref | Prediction server |
|-------------|------------------|----------------------------------------------------------|---------------------------------------------------------------------|-------------------|-----------|-----|-------------------|
| N1          | RsgI2            | <i>Clostridium thermocellum</i>                          | Putative cellulosomal family 3 carbohydrate binding module          | 16%               | 4B9P      | [1] | Phyre2/Robetta    |
| N1          | ScaA             | <i>Acetivibrio Cellulolyticus</i>                        | Family 3B carbohydrate binding module – binds strongly to cellulose | 21%               | 3ZQW      | [2] | Phyre2            |
| N1          | CipC             | <i>Clostridium cellulolyticum</i>                        | Family 3A carbohydrate binding module – binds strongly to cellulose | 20%               | 1G43      | [3] | Phyre2            |
| N1          | Endo-glucanase D | <i>Clostridium cellulovorans</i>                         | C-terminal carbohydrate binding module                              | 17%               | 3NDY      | N/A | Phyre2            |
| N1          | Chi18aC          | <i>Streptomyces coelicolor</i>                           | Chitinase chitin binding domain                                     | 18%               | 2RTT      | N/A | Phyre2            |
| N1          | RsgI3            | <i>Clostridium thermocellum</i>                          | Putative cellulosomal family 3 carbohydrate binding module          | 14%               | 4B97      | [1] | Phyre2            |
| N1          | CBDcex           | <i>Cellulomonas fimi</i>                                 | Cellulose carbohydrate binding module                               | 19%               | 1EXH      | [4] | Phyre2            |
| N2          | RG-lyase         | <i>Aspergillus aculeatus</i>                             | Rhamnogalacturonan lyase fibronectin type III domain                | 19%               | 1NKG      | [5] | Phyre2            |
| N2          | CbhA             | <i>Clostridium thermocellum</i>                          | Cellobiohydrolase A fibronectin type III domain                     | 16%               | 3PE9/3PDG | [6] | Phyre2            |
| N2          | Tenascin         | <i>Chicken</i>                                           | Tandem fibronectin type III domains                                 | 12%               | 1QR4      | [7] | Robetta           |
| N3          | ChiA             | <i>Autographa californica nuclear polyhedrosis virus</i> | N-terminal chitinase domain – chitin binding                        | 15%               | 5DF0      | N/A | Phyre2            |

## References

1. Yaniv O, Fichman G, Borovok I, Shoham Y, Bayer EA, Lamed R, et al. Fine-structural variance of family 3 carbohydrate-binding modules as extracellular biomass-sensing components of *Clostridium thermocellum* anti-sigmaI factors. *Acta Crystallogr D Biol Crystallogr.* 2014;70(Pt 2):522-34. Epub 2014/02/18. doi: 10.1107/S139900471302926X. PubMed PMID: 24531486.
2. Yaniv O, Halfon Y, Shimon LJ, Bayer EA, Lamed R, Frolow F. Structure of CBM3b of the major cellulosomal scaffoldin subunit ScaA from *Acetivibrio cellulolyticus*. *Acta Crystallogr Sect F Struct Biol Cryst Commun.* 2012;68(Pt 1):8-13. Epub 2012/01/11. doi: 10.1107/S174430911104807X. PubMed PMID: 22232162; PubMed Central PMCID: PMC3253825.

3. Shimon LJ, Pages S, Belaich A, Belaich JP, Bayer EA, Lamed R, et al. Structure of a family IIIa scaffoldin CBD from the cellulosome of *Clostridium cellulolyticum* at 2.2 Å resolution. *Acta Crystallogr D Biol Crystallogr*. 2000;56(Pt 12):1560-8. Epub 2000/11/28. PubMed PMID: 11092922.
4. Xu GY, Ong E, Gilkes NR, Kilburn DG, Muhandiram DR, Harris-Brandts M, et al. Solution structure of a cellulose-binding domain from *Cellulomonas fimi* by nuclear magnetic resonance spectroscopy. *Biochemistry*. 1995;34(21):6993-7009. Epub 1995/05/30. PubMed PMID: 7766609.
5. McDonough MA, Kadirvelraj R, Harris P, Poulsen JC, Larsen S. Rhamnogalacturonan lyase reveals a unique three-domain modular structure for polysaccharide lyase family 4. *FEBS Lett*. 2004;565(1-3):188-94. Epub 2004/05/12. doi: 10.1016/j.febslet.2004.03.094. PubMed PMID: 15135077.
6. Brunecky R, Alahuhta M, Bomble YJ, Xu Q, Baker JO, Ding SY, et al. Structure and function of the *Clostridium thermocellum* cellobiohydrolase A X1-module repeat: enhancement through stabilization of the CbhA complex. *Acta Crystallogr D Biol Crystallogr*. 2012;68(Pt 3):292-9. Epub 2012/02/22. doi: 10.1107/S09074444912001680. PubMed PMID: 22349231.
7. Bisig D, Weber P, Vaughan L, Winterhalter KH, Piontek K. Purification, crystallization and preliminary crystallographic studies of a two fibronectin type-III domain segment from chicken tenascin encompassing the heparin- and contactin-binding regions. *Acta Crystallogr D Biol Crystallogr*. 1999;55(Pt 5):1069-73. Epub 1999/04/27. PubMed PMID: 10216309.
