# Supplementary material for: Structure and functional analysis of the Legionella pneumophila chitinase ChiA reveals a novel mechanism of metal-dependent mucin degradation
Source: PubMed Central journal article supplement (PMC7224574; doi:10.1371/journal.ppat.1008342), 2020-05-04
Supplement: ppat.1008342.s014.pdf [file ppat.1008342.s014.pdf]

**S2 Table. SAXS structural parameters.**

| SAXS data collection               |                    |
|------------------------------------|--------------------|
| Beamline                           | DLS B21            |
| Wavelength (Å)                     | 1.0                |
| q Range (Å <sup>-1</sup> )         | 0.004 to 0.4       |
| Concentration range (mg/mL)        | 0.5 to 4           |
| Structural parameters              |                    |
| I(0)                               | 5.36e-03 ± 2.6e-05 |
| R <sub>g</sub> (nm) (from Guinier) | 5.43 ± 0.05        |
| R <sub>g</sub> (nm) (from P(r))    | 5.45 ± 0.03        |
| D <sub>max</sub> (nm) (from P(r))  | 17.77              |
| MW (kDa) (from sequence)           | 82.6               |
| MW (kDa) (from SAXS)               | 89.2               |
