# Supplementary material for: Structure and functional analysis of the Legionella pneumophila chitinase ChiA reveals a novel mechanism of metal-dependent mucin degradation
Source: PubMed Central journal article supplement (PMC7224574; doi:10.1371/journal.ppat.1008342), 2020-05-04
Supplement: ppat.1008342.s015.pdf [file ppat.1008342.s015.pdf]

**S3 Table. SAXS ensemble optimization parameters.**

|                                      | Run 1         | Run 2         | Run 3         | Average     |
|--------------------------------------|---------------|---------------|---------------|-------------|
| $R_{\text{flex}}$ (random)           | 90.47 (89.14) | 91.60 (89.70) | 92.14 (89.72) | 91.4 (89.5) |
| $R_{\text{sig}}$                     | 1.22          | 1.22          | 1.25          | 1.23        |
| $\chi^2$                             | 1.07          | 1.05          | 1.14          | 1.09        |
| Cluster 1 (%)                        | 17.2          | 19.3          | 18.2          | 18.2        |
| Cluster 2 (%)                        | 49.4          | 40.6          | 46.4          | 45.5        |
| Cluster 3 (%)                        | 33.4          | 40.1          | 35.4          | 36.3        |
| Final ensemble $R_g$ (nm)            | 5.40          | 5.43          | 5.39          | 5.41        |
| Final ensemble $D_{\text{max}}$ (nm) | 17.11         | 17.28         | 16.73         | 17.04       |
