# Supplementary material for: Structure and functional analysis of the Legionella pneumophila chitinase ChiA reveals a novel mechanism of metal-dependent mucin degradation
Source: PubMed Central journal article supplement (PMC7224574; doi:10.1371/journal.ppat.1008342), 2020-05-04
Supplement: ppat.1008342.s016.pdf [file ppat.1008342.s016.pdf]

**S4 Table. Primers used in this study.**

| Primer | Description                | Sequence (5' to 3')                                                        |
|--------|----------------------------|----------------------------------------------------------------------------|
| JG9    | ChiA-FL F                  | GACGACGACAAGATGAATACCTCTTTAAAACCCCTCAATTGCC                                |
| JG10   | ChiA-FL R                  | GAGGAGAAGCCCGGTTACTCACAAACACCATTAATAGCACAAATTTTTC                          |
| JG9    | ChiA-NT F                  | GACGACGACAAGATGAATACCTCTTTAAAACCCCTCAATTGCC                                |
| JG11   | ChiA-NT R                  | GAGGAGAAGCCCGGTTAAGATAAAGTGATGTTTACTGTTGCATTTTC                            |
| JG9    | ChiA-N1 F                  | GACGACGACAAGATGAATACCTCTTTAAAACCCCTCAATTGCC                                |
| JG12   | ChiA-N1 R                  | GAGGAGAAGCCCGGTTAGATGCTTCCTGATTCAACCGTTG                                   |
| JG13   | ChiA-N2 F                  | GACGACGACAAGATGGGAAGCATCCAATTAATCAATGCTGC                                  |
| JG14   | ChiA-N2 R                  | GAGGAGAAGCCCGGTTAATCGTTATATTGAATTGCAGGAGTTGAG                              |
| JG15   | ChiA-N3 F                  | GACGACGACAAGATGGGGAGTAGTTACCAATTCTCAACTC                                   |
| JG11   | ChiA-N3 R                  | GAGGAGAAGCCCGGTTAAGATAAAGTGATGTTTACTGTTGCATTTTC                            |
| JG16   | ChiA-CTD F                 | GACGACGACAAGATGGTAACCGCTGCAAAGGGC                                          |
| JG10   | ChiA-CTD R                 | GAGGAGAAGCCCGGTTACTCACAAACACCATTAATAGCACAAATTTTTC                          |
| JG17   | ChiA-CTD<br>E543M mutant F | AGGAGTTAATTTCTCAATATGGTTTTGATGGGTTTGATACAGATATTATGCAT<br>GGTATTAACGCTAGCGG |
| JG18   | ChiA-CTD<br>E543M mutant R | CCGCTAGCGTTAATACCATGCATAATATCTGTATCAAACCCATCAAAACCATA<br>TTGAGAAATTAACCTCT |
| JG19   | NttE F                     | GACGACGACAAGATGAATTCGGATGACAATGCTGATGGC                                    |
| JG20   | NttE R                     | GAGGAGAAGCCCGGTTACAAACAATGTTTATTAGGATTTCTCTTCATAC                          |
| PC1    | SsIE F                     | AGGAGATATACCATGAGCTACCCGCTCAACTATATG                                       |
| PC2    | SsIE R                     | GTGATGGTGATGTTTCTCGACAGACATCTTATGC                                         |
