# Supplementary material for: Structure and functional analysis of the Legionella pneumophila chitinase ChiA reveals a novel mechanism of metal-dependent mucin degradation
Source: PubMed Central journal article supplement (PMC7224574; doi:10.1371/journal.ppat.1008342), 2020-05-04
Supplement: ppat.1008342.s017.pdf [file ppat.1008342.s017.pdf]

## S5 Table. Synthetic genes.

| Gene | Description                 | Sequence (5' to 3')                                                                                                                                                                                                                                                                                                                                                                                                                                                                                                                                                                                                                                                                                                                                                                                                                                                                                                                                                                                                                                                                                                                                                                                           |
|------|-----------------------------|---------------------------------------------------------------------------------------------------------------------------------------------------------------------------------------------------------------------------------------------------------------------------------------------------------------------------------------------------------------------------------------------------------------------------------------------------------------------------------------------------------------------------------------------------------------------------------------------------------------------------------------------------------------------------------------------------------------------------------------------------------------------------------------------------------------------------------------------------------------------------------------------------------------------------------------------------------------------------------------------------------------------------------------------------------------------------------------------------------------------------------------------------------------------------------------------------------------|
| CM4  | ChiA-CTD<br>D504A<br>mutant | <u>CCATGGTCCATCATCATCATCATCATGTGGACGACGACGACAAGATGGTTACCGCAGCAAAAAGG</u><br>TCGCATTATTGGTTATGTTCCAGGTTGGAAAACCCCTCCGGCAGCACAAGAACTGGCAAGCGCA<br>GGTTATACCCATGTTATGATTCGATTTGGTGTGTTTCAGCACCAATACACCGGGTGTATTGTTC<br>CGGCATTTGAAACCATTACCAAAGAGTATATTTCAGAGCCTGCATCAGGCAGGCATTAAGGTTAT<br>TCTGAGCTTAGGTGGTGCACCTGACCAGCATTCCGAATACCACCGTTGCGTTTCATCAGGTTCTG<br>GTTGCAAGCAGCAGTCCGGAAGCATTAAACAGACCTTTATTAACAGCCTGAAAGAACTGATTA<br>GCCAGTATGGTTTGGATGGCTTTGATACCGATATTGAGCATGGTATTAATGCCAGCGGTAGCTT<br>TAGCCAGCCGACAGGGTATATTGCAGTTCCTGGCAAGCATTATTAACACCATGTATAGCCAGAAT<br>AGCAGCCTGCTGATTACCCTGACACCGCAGGTTGCAAATATTGCAGCAACCAGCGGTTTTGATC<br>AGACCTGGGGTAATTATGCAAGCCTGATTATGCAGACCCATCAGAGTCTGGCATGGGTTGGTAT<br>TCAGCTGTATAATAACCGTTGTGCCTTTGGTATTGATCAGGTTTGTATTGGTCCGACACCGACC<br>GATACACCGGATTTAGCGTTGCAATGGCAACCGATCTGCTGGAAAATTGGCCTGCAACCGTTA<br>ATGGTTCGTCAGCCGTTTTTCAGCCGTATATTAGCTATCTGCGTCCGAGCCAGATTGTGATTGG<br>TTATCCGAGTCCGAATGCAAGCGGTGGTAGTGTAGTGGTAGTCCGGTTACACCGACCACCACCATT<br>AAACGTGCAATTCAGTGTCTGAAAACAGCCATTGCAGGTAATACCAGCTGTGGTGTATTATGTTTC<br>CGCCTCGTGCATATGGTAATATTGGTGGTGTGTTAATTGGGAAGTGACCTACGATAAAAAACAA<br>CCAGTTCAAATTCGCCAAAGAGCTGAAAAATTGCGCGATTAATGGCGTGTGTGAATAACTCGAG |
| CM5  | ChiA-CTD<br>H506A<br>mutant | <u>CCATGGTCCATCATCATCATCATCATGTGGACGACGACGACAAGATGGTTACCGCAGCAAAAAGG</u><br>TCGCATTATTGGTTATGTTCCAGGTTGGAAAACCCCTCCGGCAGCACAAGAACTGGCAAGCGCA<br>GGTTATACCCATGTTATGATTCGATTTGGTGTGTTTCAGCACCAATACACCGGGTGTATTGTTC<br>CGGCATTTGAAACCATTACCAAAGAGTATATTTCAGAGCCTGCATCAGGCAGGCATTAAGGTTAT<br>TCTGAGCTTAGGTGGTGCACCTGACCAGCATTCCGAATACCACCGTTGATTTTGCAGAGGTTCTG<br>GTTGCAAGCAGCAGTCCGGAAGCATTAAACAGACCTTTATTAACAGCCTGAAAGAACTGATTA<br>GCCAGTATGGTTTGGATGGCTTTGATACCGATATTGAGCATGGTATTAATGCCAGCGGTAGCTT<br>TAGCCAGCCGACAGGGTATATTGCAGTTCCTGGCAAGCATTATTAACACCATGTATAGCCAGAAT<br>AGCAGCCTGCTGATTACCCTGACACCGCAGGTTGCAAATATTGCAGCAACCAGCGGTTTTGATC<br>AGACCTGGGGTAATTATGCAAGCCTGATTATGCAGACCCATCAGAGTCTGGCATGGGTTGGTAT<br>TCAGCTGTATAATAACCGTTGTGCCTTTGGTATTGATCAGGTTTGTATTGGTCCGACACCGACC<br>GATACACCGGATTTAGCGTTGCAATGGCAACCGATCTGCTGGAAAATTGGCCTGCAACCGTTA<br>ATGGTTCGTCAGCCGTTTTTCAGCCGTATATTAGCTATCTGCGTCCGAGCCAGATTGTGATTGG<br>TTATCCGAGTCCGAATGCAAGCGGTGGTAGTGTAGTGGTAGTCCGGTTACACCGACCACCACCATT<br>AAACGTGCAATTCAGTGTCTGAAAACAGCCATTGCAGGTAATACCAGCTGTGGTGTATTATGTTTC<br>CGCCTCGTGCATATGGTAATATTGGTGGTGTGTTAATTGGGAAGTGACCTACGATAAAAAACAA<br>CCAGTTCAAATTCGCCAAAGAGCTGAAAAATTGCGCGATTAATGGCGTGTGTGAATAACTCGAG |
| CM6  | ChiA-CTD<br>H544A<br>mutant | <u>CCATGGTCCATCATCATCATCATCATGTGGACGACGACGACAAGATGGTTACCGCAGCAAAAAGG</u><br>TCGCATTATTGGTTATGTTCCAGGTTGGAAAACCCCTCCGGCAGCACAAGAACTGGCAAGCGCA<br>GGTTATACCCATGTTATGATTCGATTTGGTGTGTTTCAGCACCAATACACCGGGTGTATTGTTC<br>CGGCATTTGAAACCATTACCAAAGAGTATATTTCAGAGCCTGCATCAGGCAGGCATTAAGGTTAT<br>TCTGAGCTTAGGTGGTGCACCTGACCAGCATTCCGAATACCACCGTTGATTTTCATCAGGTTCTG<br>GTTGCAAGCAGCAGTCCGGAAGCATTAAACAGACCTTTATTAACAGCCTGAAAGAACTGATTA<br>GCCAGTATGGTTTGGATGGCTTTGATACCGATATTGAGGCGGGTATTAATGCCAGCGGTAGCTT<br>TAGCCAGCCGACAGGGTATATTGCAGTTCCTGGCAAGCATTATTAACACCATGTATAGCCAGAAT<br>AGCAGCCTGCTGATTACCCTGACACCGCAGGTTGCAAATATTGCAGCAACCAGCGGTTTTGATC<br>AGACCTGGGGTAATTATGCAAGCCTGATTATGCAGACCCATCAGAGTCTGGCATGGGTTGGTAT<br>TCAGCTGTATAATAACCGTTGTGCCTTTGGTATTGATCAGGTTTGTATTGGTCCGACACCGACC<br>GATACACCGGATTTAGCGTTGCAATGGCAACCGATCTGCTGGAAAATTGGCCTGCAACCGTTA<br>ATGGTTCGTCAGCCGTTTTTCAGCCGTATATTAGCTATCTGCGTCCGAGCCAGATTGTGATTGG<br>TTATCCGAGTCCGAATGCAAGCGGTGGTAGTGTAGTGGTAGTCCGGTTACACCGACCACCACCATT<br>AAACGTGCAATTCAGTGTCTGAAAACAGCCATTGCAGGTAATACCAGCTGTGGTGTATTATGTTTC<br>CGCCTCGTGCATATGGTAATATTGGTGGTGTGTTAATTGGGAAGTGACCTACGATAAAAAACAA<br>CCAGTTCAAATTCGCCAAAGAGCTGAAAAATTGCGCGATTAATGGCGTGTGTGAATAACTCGAG |
| CM7  | ChiA-CTD<br>N547A<br>mutant | <u>CCATGGTCCATCATCATCATCATCATGTGGACGACGACGACAAGATGGTTACCGCAGCAAAAAGG</u><br>TCGCATTATTGGTTATGTTCCAGGTTGGAAAACCCCTCCGGCAGCACAAGAACTGGCAAGCGCA<br>GGTTATACCCATGTTATGATTCGATTTGGTGTGTTTCAGCACCAATACACCGGGTGTATTGTTC<br>CGGCATTTGAAACCATTACCAAAGAGTATATTTCAGAGCCTGCATCAGGCAGGCATTAAGGTTAT<br>TCTGAGCTTAGGTGGTGCACCTGACCAGCATTCCGAATACCACCGTTGATTTTCATCAGGTTCTG<br>GTTGCAAGCAGCAGTCCGGAAGCATTAAACAGACCTTTATTAACAGCCTGAAAGAACTGATTA<br>GCCAGTATGGTTTGGATGGCTTTGATACCGATATTGAGCATGGTATTGCGGCCAGCGGTAGCTT<br>TAGCCAGCCGACAGGGTATATTGCAGTTCCTGGCAAGCATTATTAACACCATGTATAGCCAGAAT<br>AGCAGCCTGCTGATTACCCTGACACCGCAGGTTGCAAATATTGCAGCAACCAGCGGTTTTGATC<br>AGACCTGGGGTAATTATGCAAGCCTGATTATGCAGACCCATCAGAGTCTGGCATGGGTTGGTAT<br>TCAGCTGTATAATAACCGTTGTGCCTTTGGTATTGATCAGGTTTGTATTGGTCCGACACCGACC<br>GATACACCGGATTTAGCGTTGCAATGGCAACCGATCTGCTGGAAAATTGGCCTGCAACCGTTA<br>ATGGTTCGTCAGCCGTTTTTCAGCCGTATATTAGCTATCTGCGTCCGAGCCAGATTGTGATTGG<br>TTATCCGAGTCCGAATGCAAGCGGTGGTAGTGTAGTGGTAGTCCGGTTACACCGACCACCACCATT<br>AAACGTGCAATTCAGTGTCTGAAAACAGCCATTGCAGGTAATACCAGCTGTGGTGTATTATGTTTC<br>CGCCTCGTGCATATGGTAATATTGGTGGTGTGTTAATTGGGAAGTGACCTACGATAAAAAACAA<br>CCAGTTCAAATTCGCCAAAGAGCTGAAAAATTGCGCGATTAATGGCGTGTGTGAATAACTCGAG |

ATGGTTCGTCGACCGGTTTTTCAGCCGTATATAGCTATCTGCGTCCGAGCCAGATTGTGATTGG  
TTATCCGAGTCCGAATGCAAGCGGTGGTAGTGATGGTAGTCCGGTTACACCGACCACCACCATT  
AAACGTGCAATTCAGTGTCTGAAAAAGCCATTGCAGGTAATACCAGCTGTGGTGTATTATGTTT  
CGCCTCGTGCATATGGTAATATGGTGGTGTGTTAATTGGGAAGTGACCTACGATAAAAAACAA  
CCAGTTCAAATTCGCCAAAGAGCTGAAAAAATTGCGCGATTAATGGCGTGTGTGAATAACTCGAG

CM8 ChiA-CTD  
Q595A  
mutant

CCATGGTCCATCATCATCATCATCATGTGGACGACGACGACAAGATGGTTACCGCAGCAAAAAGG  
TCGCATTATTGGTTATGTTCCAGGTTGGAAAACCCCTCCGGCAGCACAAGAATGGCAAGCGCA  
GGTTATACCCATGTTATGATTGCATTTGGTGTGTTTCAGCACCAATACACCGGGTGTATTGTTT  
CGGCATTTGAAACCATTACCAAAGAGTATATTCAGAGCCTGCATCAGGCAGGCATTAAAGTTAT  
TCTGAGCTTAGGTGGTGCACCTGACCAGCATTCCGAATACCACCGTTGATTTTCATCAGGTTCTG  
GTTGCAAGCAGCAGTCCGGAAGCATTTAAACAGACCTTTATTAACAGCCTGAAAGAACTGATTA  
GCCAGTATGGTTTTGATGGCTTTGATACCGATATTGAGCATGGTATTAATGCCAGCGGTAGCTT  
TAGCCAGCCGCAGGGTGATATTGCAGTTCTGGCAAGCATTATTAACACCATTGTATAGCCAGAAT  
AGCAGCCTGCTGATTACCCTGACACCGCAGGTTGCAAATATTGCAGCAACCAGCGGTTTTGATG  
CGACCTGGGGTAATTATGCAAGCCTGATTATGCAGACCCATCAGAGTCTGGCATGGGTTGGTAT  
TCAGCTGTATAATACCGGTTGTGCCTTTGGTATTGATCAGGTTTGTATGGTCCGACACCGACC  
GATACACCGGATTTTAGCGTTGCAATGGCAACCAGTCTGCTGGAAAATTGGCCTGCAACCGTTA  
ATGGTTCGTCGACCGGTTTTTCAGCCGTATATAGCTATCTGCGTCCGAGCCAGATTGTGATTGG  
TTATCCGAGTCCGAATGCAAGCGGTGGTAGTGATGGTAGTCCGGTTACACCGACCACCACCATT  
AAACGTGCAATTCAGTGTCTGAAAAAGCCATTGCAGGTAATACCAGCTGTGGTGTATTATGTTT  
CGCCTCGTGCATATGGTAATATGGTGGTGTGTTAATTGGGAAGTGACCTACGATAAAAAACAA  
CCAGTTCAAATTCGCCAAAGAGCTGAAAAAATTGCGCGATTAATGGCGTGTGTGAATAACTCGAG

CM9 ChiA-CTD  
Q583A  
mutant

CCATGGTCCATCATCATCATCATCATGTGGACGACGACGACAAGATGGTTACCGCAGCAAAAAGG  
TCGCATTATTGGTTATGTTCCAGGTTGGAAAACCCCTCCGGCAGCACAAGAATGGCAAGCGCA  
GGTTATACCCATGTTATGATTGCATTTGGTGTGTTTCAGCACCAATACACCGGGTGTATTGTTT  
CGGCATTTGAAACCATTACCAAAGAGTATATTCAGAGCCTGCATCAGGCAGGCATTAAAGTTAT  
TCTGAGCTTAGGTGGTGCACCTGACCAGCATTCCGAATACCACCGTTGATTTTCATCAGGTTCTG  
GTTGCAAGCAGCAGTCCGGAAGCATTTAAACAGACCTTTATTAACAGCCTGAAAGAACTGATTA  
GCCAGTATGGTTTTGATGGCTTTGATACCGATATTGAGCATGGTATTAATGCCAGCGGTAGCTT  
TAGCCAGCCGCAGGGTGATATTGCAGTTCTGGCAAGCATTATTAACACCATTGTATAGCCAGAAT  
AGCAGCCTGCTGATTACCCTGACACCGCGGTTGCAAATATTGCAGCAACCAGCGGTTTTGATC  
AGACCTGGGGTAATTATGCAAGCCTGATTATGCAGACCCATCAGAGTCTGGCATGGGTTGGTAT  
TCAGCTGTATAATACCGGTTGTGCCTTTGGTATTGATCAGGTTTGTATGGTCCGACACCGACC  
GATACACCGGATTTTAGCGTTGCAATGGCAACCAGTCTGCTGGAAAATTGGCCTGCAACCGTTA  
ATGGTTCGTCGACCGGTTTTTCAGCCGTATATAGCTATCTGCGTCCGAGCCAGATTGTGATTGG  
TTATCCGAGTCCGAATGCAAGCGGTGGTAGTGATGGTAGTCCGGTTACACCGACCACCACCATT  
AAACGTGCAATTCAGTGTCTGAAAAAGCCATTGCAGGTAATACCAGCTGTGGTGTATTATGTTT  
CGCCTCGTGCATATGGTAATATGGTGGTGTGTTAATTGGGAAGTGACCTACGATAAAAAACAA  
CCAGTTCAAATTCGCCAAAGAGCTGAAAAAATTGCGCGATTAATGGCGTGTGTGAATAACTCGAG

CM10 ChiA-CTD  
Q617A  
mutant

CCATGGTCCATCATCATCATCATCATGTGGACGACGACGACAAGATGGTTACCGCAGCAAAAAGG  
TCGCATTATTGGTTATGTTCCAGGTTGGAAAACCCCTCCGGCAGCACAAGAATGGCAAGCGCA  
GGTTATACCCATGTTATGATTGCATTTGGTGTGTTTCAGCACCAATACACCGGGTGTATTGTTT  
CGGCATTTGAAACCATTACCAAAGAGTATATTCAGAGCCTGCATCAGGCAGGCATTAAAGTTAT  
TCTGAGCTTAGGTGGTGCACCTGACCAGCATTCCGAATACCACCGTTGATTTTCATCAGGTTCTG  
GTTGCAAGCAGCAGTCCGGAAGCATTTAAACAGACCTTTATTAACAGCCTGAAAGAACTGATTA  
GCCAGTATGGTTTTGATGGCTTTGATACCGATATTGAGCATGGTATTAATGCCAGCGGTAGCTT  
TAGCCAGCCGCAGGGTGATATTGCAGTTCTGGCAAGCATTATTAACACCATTGTATAGCCAGAAT  
AGCAGCCTGCTGATTACCCTGACACCGCAGGTTGCAAATATTGCAGCAACCAGCGGTTTTGATC  
AGACCTGGGGTAATTATGCAAGCCTGATTATGCAGACCCATCAGAGTCTGGCATGGGTTGGTAT  
TGGCTGTATAATACCGGTTGTGCCTTTGGTATTGATCAGGTTTGTATGGTCCGACACCGACC  
GATACACCGGATTTTAGCGTTGCAATGGCAACCAGTCTGCTGGAAAATTGGCCTGCAACCGTTA  
ATGGTTCGTCGACCGGTTTTTCAGCCGTATATAGCTATCTGCGTCCGAGCCAGATTGTGATTGG  
TTATCCGAGTCCGAATGCAAGCGGTGGTAGTGATGGTAGTCCGGTTACACCGACCACCACCATT  
AAACGTGCAATTCAGTGTCTGAAAAAGCCATTGCAGGTAATACCAGCTGTGGTGTATTATGTTT  
CGCCTCGTGCATATGGTAATATGGTGGTGTGTTAATTGGGAAGTGACCTACGATAAAAAACAA  
CCAGTTCAAATTCGCCAAAGAGCTGAAAAAATTGCGCGATTAATGGCGTGTGTGAATAACTCGAG

CM11 ChiA-CTD  
E543M/  
D504A  
mutant

CCATGGTCCATCATCATCATCATCATGTGGACGACGACGACAAGATGGTTACCGCAGCAAAAAGG  
TCGCATTATTGGTTATGTTCCAGGTTGGAAAACCCCTCCGGCAGCACAAGAATGGCAAGCGCA  
GGTTATACCCATGTTATGATTGCATTTGGTGTGTTTCAGCACCAATACACCGGGTGTATTGTTT  
CGGCATTTGAAACCATTACCAAAGAGTATATTCAGAGCCTGCATCAGGCAGGCATTAAAGTTAT  
TCTGAGCTTAGGTGGTGCACCTGACCAGCATTCCGAATACCACCGTTGCGTTTCATCAGGTTCTG  
GTTGCAAGCAGCAGTCCGGAAGCATTTAAACAGACCTTTATTAACAGCCTGAAAGAACTGATTA  
GCCAGTATGGTTTTGATGGCTTTGATACCGATATTATGCATGGTATTAATGCCAGCGGTAGCTT  
TAGCCAGCCGCAGGGTGATATTGCAGTTCTGGCAAGCATTATTAACACCATTGTATAGCCAGAAT  
AGCAGCCTGCTGATTACCCTGACACCGCAGGTTGCAAATATTGCAGCAACCAGCGGTTTTGATC  
AGACCTGGGGTAATTATGCAAGCCTGATTATGCAGACCCATCAGAGTCTGGCATGGGTTGGTAT  
TCAGCTGTATAATACCGGTTGTGCCTTTGGTATTGATCAGGTTTGTATGGTCCGACACCGACC

GATACACCGGATTTTAGCGTTGCAATGGCAACCGATCTGCTGGAAAATTGGCCTGCAACCGTTA  
ATGGTTCGTCACCGGTTTTTCAGCCGTATATTAGCTATCTGCGTCCGAGCCAGATTGTGATTGG  
TTATCCGAGTCCGAATGCAAGCGGTGGTAGTGATGGTAGTCCGGTTACACCGACCACCACCTT  
AAACGTGCAATTCAGTGTCTGAAAACAGCCATTGCAGGTAATACCAGCTGTGGTGTATTGATTC  
CGCCTCGTGCATATGGTAATATTGGTGGTGTGTTAATTGGGAAGTGACCTACGATAAAAAACAA  
CCAGTTCAAATTCGCCAAAGAGCTGAAAAATTGCGCGATTAATGGCGTGTGTGAATAACTCGAG

CM12 ChiA-CTD  
E543M/  
H506A  
mutant

CCATGGTCCATCATCATCATCATCATGTGGACGACGACGACAAGATGGTTACCGCAGCAAAGG  
TCGCATTATTGGTTATGTTCCAGGTTGGAAAACCCCTCCGGCAGCACAAAGAACTGGCAAGCGCA  
GGTTATACCCATGTTATGATTCGATTTGGTGTGTTTTCAGCACCAATACACCGGGTGTATTGTTC  
CGGCATTTGAAACCATTACCAAAGAGTATATTTCAGAGCCTGCATCAGGCAGGCATTAAGTTAT  
TCTGAGCTTAGGTGGTGCACCTGACCAGCATTCCGAATACCACCGTTGATTTTTCAGCGAGTTCTG  
GTTGCAAGCAGCAGTCCGGAAGCATTAAACAGACCTTTATTAACAGCCTGAAAGAACTGATTA  
GCCAGTATGGTTTTGATGGCTTTGATACCGATATTATGCATGGTATTAATGCCAGCGGTAGCTT  
TAGCCAGCCGAGGGTGATATTGCAGTTCTGGCAAGCATTATTAACACCATGTATAGCCAGAAT  
AGCAGCCTGCTGATTACCTTGACACCGCAGGTTGCAAATATTGCAGCAACCAGCGGTTTTGATC  
AGACCTGGGGTAATTATGCAAGCCTGATTATGCAGACCCATCAGAGTCTGGCATGGGTTGGTAT  
TCAGCTGTATAATAACCGTTGTGCCTTTGGTATTGATCAGGTTTGTATTGGTCCGACACCGACC  
GATACACCGGATTTTAGCGTTGCAATGGCAACCGATCTGCTGGAAAATTGGCCTGCAACCGTTA  
ATGGTTCGTCACCGGTTTTTCAGCCGTATATTAGCTATCTGCGTCCGAGCCAGATTGTGATTGG  
TTATCCGAGTCCGAATGCAAGCGGTGGTAGTGATGGTAGTCCGGTTACACCGACCACCACCTT  
AAACGTGCAATTCAGTGTCTGAAAACAGCCATTGCAGGTAATACCAGCTGTGGTGTATTGTTTC  
CGCCTCGTGCATATGGTAATATTGGTGGTGTGTTAATTGGGAAGTGACCTACGATAAAAAACAA  
CCAGTTCAAATTCGCCAAAGAGCTGAAAAATTGCGCGATTAATGGCGTGTGTGAATAACTCGAG

CM13 ChiA-CTD  
E543M/  
H544A  
mutant

CCATGGTCCATCATCATCATCATCATGTGGACGACGACGACAAGATGGTTACCGCAGCAAAGG  
TCGCATTATTGGTTATGTTCCAGGTTGGAAAACCCCTCCGGCAGCACAAAGAACTGGCAAGCGCA  
GGTTATACCCATGTTATGATTCGATTTGGTGTGTTTTCAGCACCAATACACCGGGTGTATTGTTC  
CGGCATTTGAAACCATTACCAAAGAGTATATTTCAGAGCCTGCATCAGGCAGGCATTAAGTTAT  
TCTGAGCTTAGGTGGTGCACCTGACCAGCATTCCGAATACCACCGTTGATTTTTCATCAGGTTCTG  
GTTGCAAGCAGCAGTCCGGAAGCATTAAACAGACCTTTATTAACAGCCTGAAAGAACTGATTA  
GCCAGTATGGTTTTGATGGCTTTGATACCGATATTATGGCGGGTATTAATGCCAGCGGTAGCTT  
TAGCCAGCCGAGGGTGATATTGCAGTTCTGGCAAGCATTATTAACACCATGTATAGCCAGAAT  
AGCAGCCTGCTGATTACCTTGACACCGCAGGTTGCAAATATTGCAGCAACCAGCGGTTTTGATC  
AGACCTGGGGTAATTATGCAAGCCTGATTATGCAGACCCATCAGAGTCTGGCATGGGTTGGTAT  
TCAGCTGTATAATAACCGTTGTGCCTTTGGTATTGATCAGGTTTGTATTGGTCCGACACCGACC  
GATACACCGGATTTTAGCGTTGCAATGGCAACCGATCTGCTGGAAAATTGGCCTGCAACCGTTA  
ATGGTTCGTCACCGGTTTTTCAGCCGTATATTAGCTATCTGCGTCCGAGCCAGATTGTGATTGG  
TTATCCGAGTCCGAATGCAAGCGGTGGTAGTGATGGTAGTCCGGTTACACCGACCACCACCTT  
AAACGTGCAATTCAGTGTCTGAAAACAGCCATTGCAGGTAATACCAGCTGTGGTGTATTGTTTC  
CGCCTCGTGCATATGGTAATATTGGTGGTGTGTTAATTGGGAAGTGACCTACGATAAAAAACAA  
CCAGTTCAAATTCGCCAAAGAGCTGAAAAATTGCGCGATTAATGGCGTGTGTGAATAACTCGAG

CM14 ChiA-CTD  
E543M/  
N547A  
mutant

CCATGGTCCATCATCATCATCATCATGTGGACGACGACGACAAGATGGTTACCGCAGCAAAGG  
TCGCATTATTGGTTATGTTCCAGGTTGGAAAACCCCTCCGGCAGCACAAAGAACTGGCAAGCGCA  
GGTTATACCCATGTTATGATTCGATTTGGTGTGTTTTCAGCACCAATACACCGGGTGTATTGTTC  
CGGCATTTGAAACCATTACCAAAGAGTATATTTCAGAGCCTGCATCAGGCAGGCATTAAGTTAT  
TCTGAGCTTAGGTGGTGCACCTGACCAGCATTCCGAATACCACCGTTGATTTTTCATCAGGTTCTG  
GTTGCAAGCAGCAGTCCGGAAGCATTAAACAGACCTTTATTAACAGCCTGAAAGAACTGATTA  
GCCAGTATGGTTTTGATGGCTTTGATACCGATATTATGCATGGTATTGCGGCCAGCGGTAGCTT  
TAGCCAGCCGAGGGTGATATTGCAGTTCTGGCAAGCATTATTAACACCATGTATAGCCAGAAT  
AGCAGCCTGCTGATTACCTTGACACCGCAGGTTGCAAATATTGCAGCAACCAGCGGTTTTGATC  
AGACCTGGGGTAATTATGCAAGCCTGATTATGCAGACCCATCAGAGTCTGGCATGGGTTGGTAT  
TCAGCTGTATAATAACCGTTGTGCCTTTGGTATTGATCAGGTTTGTATTGGTCCGACACCGACC  
GATACACCGGATTTTAGCGTTGCAATGGCAACCGATCTGCTGGAAAATTGGCCTGCAACCGTTA  
ATGGTTCGTCACCGGTTTTTCAGCCGTATATTAGCTATCTGCGTCCGAGCCAGATTGTGATTGG  
TTATCCGAGTCCGAATGCAAGCGGTGGTAGTGATGGTAGTCCGGTTACACCGACCACCACCTT  
AAACGTGCAATTCAGTGTCTGAAAACAGCCATTGCAGGTAATACCAGCTGTGGTGTATTGTTTC  
CGCCTCGTGCATATGGTAATATTGGTGGTGTGTTAATTGGGAAGTGACCTACGATAAAAAACAA  
CCAGTTCAAATTCGCCAAAGAGCTGAAAAATTGCGCGATTAATGGCGTGTGTGAATAACTCGAG

CM15 ChiA-CTD  
E543M/  
Q595A  
mutant

CCATGGTCCATCATCATCATCATCATGTGGACGACGACGACAAGATGGTTACCGCAGCAAAGG  
TCGCATTATTGGTTATGTTCCAGGTTGGAAAACCCCTCCGGCAGCACAAAGAACTGGCAAGCGCA  
GGTTATACCCATGTTATGATTCGATTTGGTGTGTTTTCAGCACCAATACACCGGGTGTATTGTTC  
CGGCATTTGAAACCATTACCAAAGAGTATATTTCAGAGCCTGCATCAGGCAGGCATTAAGTTAT  
TCTGAGCTTAGGTGGTGCACCTGACCAGCATTCCGAATACCACCGTTGATTTTTCATCAGGTTCTG  
GTTGCAAGCAGCAGTCCGGAAGCATTAAACAGACCTTTATTAACAGCCTGAAAGAACTGATTA  
GCCAGTATGGTTTTGATGGCTTTGATACCGATATTATGCATGGTATTAATGCCAGCGGTAGCTT  
TAGCCAGCCGAGGGTGATATTGCAGTTCTGGCAAGCATTATTAACACCATGTATAGCCAGAAT  
AGCAGCCTGCTGATTACCTTGACACCGCAGGTTGCAAATATTGCAGCAACCAGCGGTTTTGATC  
CGACCTGGGGTAATTATGCAAGCCTGATTATGCAGACCCATCAGAGTCTGGCATGGGTTGGTAT

TCAGCTGTATAATACCGGTTGTGCCTTTGGTATTGATCAGGTTTGTATGGTCCGACACCGACC  
GATACACCGGATTTTAGCGTTGCAATGGCAACCGATCTGCTGGAAAATTGGCCTGCAACCGTTA  
ATGGTCGTCCGACCGGTTTTAGCCGTATATTAGCTATCTGCGTCCGAGCCAGATTGTGATTGG  
TTATCCGAGTCCGAATGCAAGCGGTGGTAGTGATGGTAGTCCGTTACACCGACCACCACCATT  
AAACGTGCAATTCAGTGTCTGAAAACAGCCATTGCAGGTAATACCAGCTGTGGTGTATGTTTC  
CGCCTCGTGCATATGGTAATATTGGTGGTGTGTTAATTGGGAAGTGACCTACGATAAAAACAA  
CCAGTTCAAATTCGCCAAAGAGCTGAAAATTCGCGGATTAATGGCGTGTGTGAATAACTCGAG

---

\*Restriction sites are underlined
